# Supplementary material for: Nano-Drugs Based on Nano Sterically Stabilized Liposomes for the Treatment of Inflammatory Neurodegenerative Diseases
Source: PubMed Central journal article supplement (PMC4492950; doi:10.1371/journal.pone.0130442), 2015-07-06
Supplement: pone.0130442.s003.pdf [file pone.0130442.s003.pdf]

**S2 Table: Comparison of the therapeutic efficacy of NSSL-MPS and EPC-based NSSL-TMN in acute EAE mice model**

| <b>Group</b>    | <b>Incidence<br/>(#dead)</b> | <b>Mean<br/>maximal<br/>score</b> | <b>Mean onset of<br/>disease (day)</b> | <b>Mean duration<br/>(days)</b> | <b>Mean burden of<br/>disease</b> |
|-----------------|------------------------------|-----------------------------------|----------------------------------------|---------------------------------|-----------------------------------|
| <b>Control</b>  | 10/10 (3)                    | 3.7±0.517                         | 12.1±1.1                               | 6.4±1.13                        | 2.54±0.223                        |
| <b>NSSL-MPS</b> | 10/10 (0)                    | 2.67±0.577                        | 12.2±0.76                              | 2.78±0.572                      | 0.8±0.166 <sup>a</sup>            |
| <b>NSSL-TMN</b> | 10/10 (1)                    | 2.94±0.586                        | 14.9±1.59                              | 5.63±1.49                       | 1.25±0.183 <sup>a,b</sup>         |

<sup>a</sup> Significant difference from the control group P<0.0001

<sup>b</sup> Significant difference from the NSSL-MPS-treated group P<0.05
